# Supplementary material for: A characterization method for equivalent elastic modulus of rock based on elastic strain energy
Source: Frontiers journal article supplement (doi:10.3389/feart.2023.1120344), 2023-02-16
Supplement: Data_Sheet_1.PDF [file Data_Sheet_1.PDF]

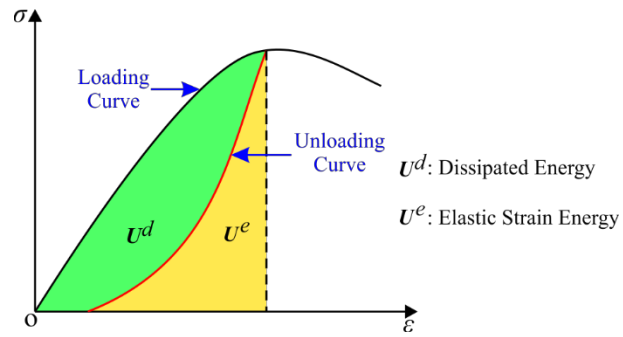

**Supplementary Figure S1** Relationships between dissipated energy and elastic strain energy of rock

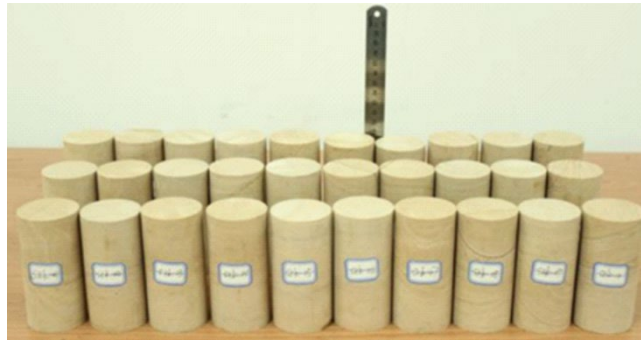

**Supplementary Figure S2** Specimens of yellow sandstone

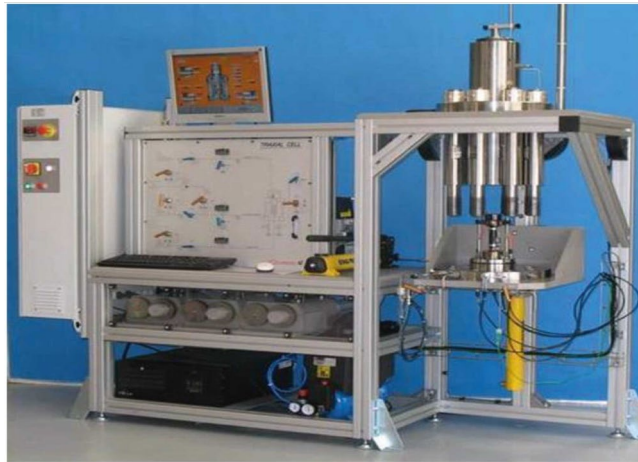

**Supplementary Figure S3** The servo-controlled rheology testing machine

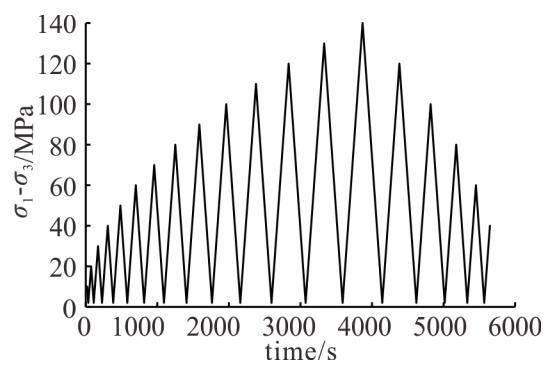

**Supplementary Figure S4** Schematic diagrams of the stress path

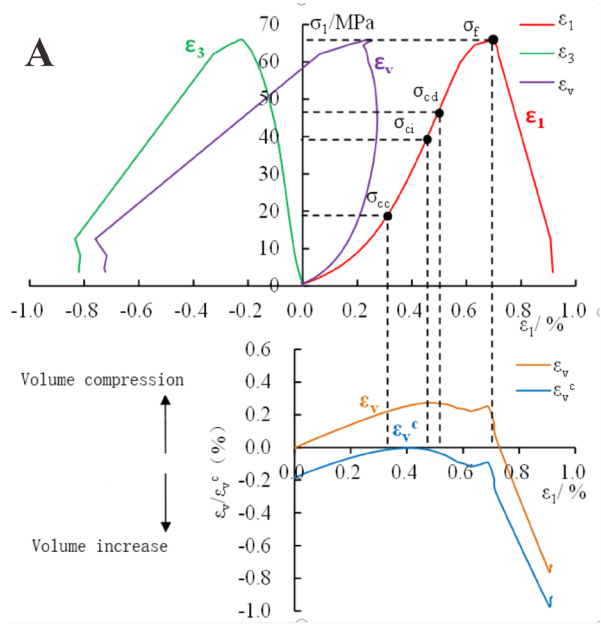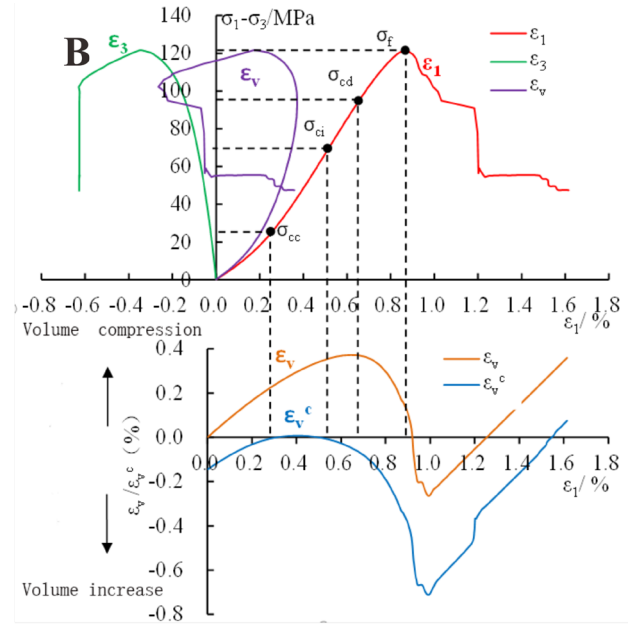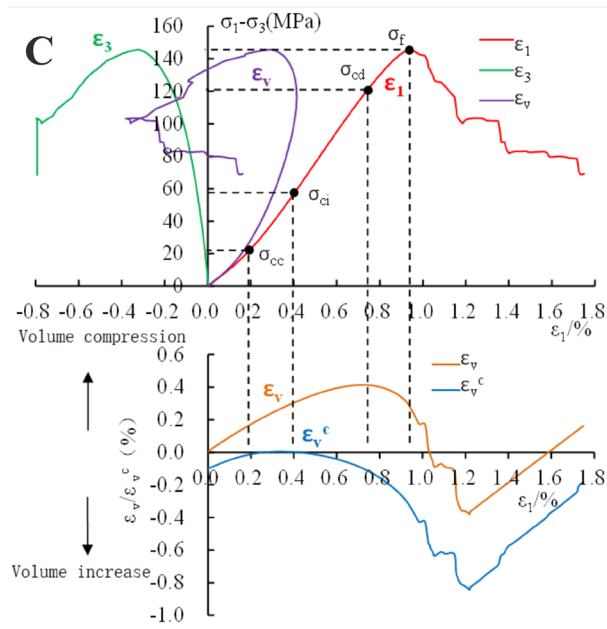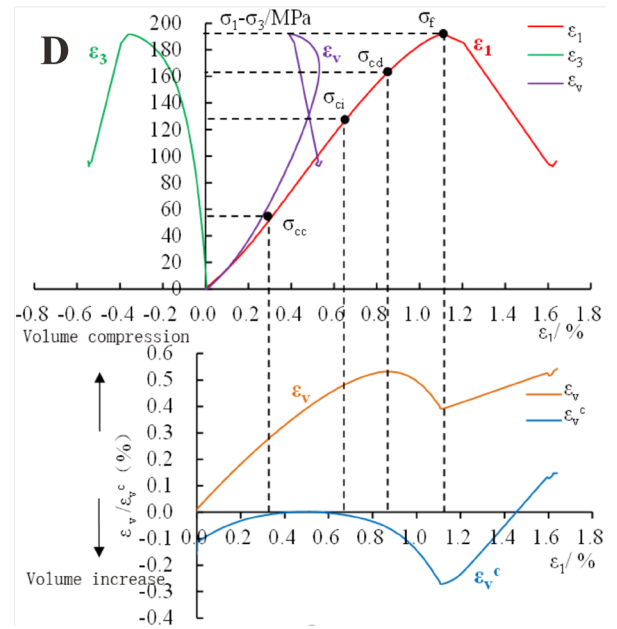

**Supplementary Figure S5** Stress-strain curves and characteristic stress of sandstone. (A)  $\sigma_3=0$  MPa. (B)  $\sigma_3=5$  MPa. (C)  $\sigma_3=10$  MPa. (D)  $\sigma_3=20$  MPa

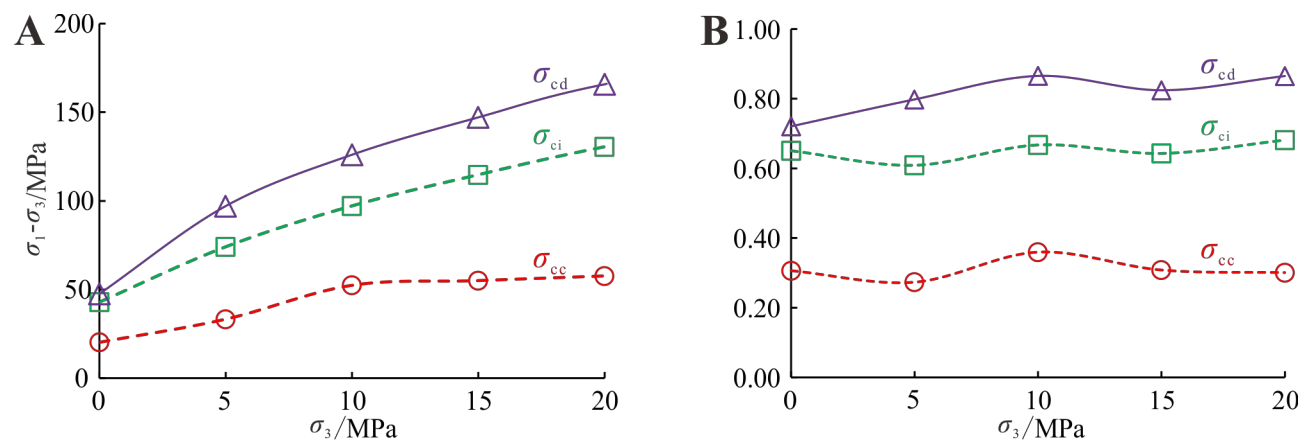

**Supplementary Figure S6** Characteristic stress of sandstone under different confining pressure. **(A)** Characteristic stress. **(B)** Normalized characteristic stress
